# Supplementary material
Source: publisher figshare collection journal article supplement (https://acs.figshare.com/ndownloader/files/5087008)
Supplement: Supplementary file 1 [file 5087008]

# Where is the sodium in self assembled monolayers of single stranded DNA ?

## Supporting material

**Table 1:** XPS results for two types of monolayers made from 15 bases long single strand DNA oligomers containing either 14 adenine and one guanine (1G) or 7 adenine and 8 guanine bases (8G) , after 12 hours adsorption using sodium phosphate buffer. The results are averaged over several take-off angles.

|                         | N/P |     | N/O  |      | C/P  |      | N/S  |      | % of Na<br>( Na/P * 100% ) |    |
|-------------------------|-----|-----|------|------|------|------|------|------|----------------------------|----|
| Sample                  | 1G  | 8G  | 1G   | 8G   | 1G   | 8G   | 1G   | 8G   | 1G                         | 8G |
| Theoretical             | 5   | 5   | 1.1  | 1.01 | 10.4 | 10.4 | 37.5 | 37.5 | -                          |    |
| Experiment<br>( ± 10% ) | 4.8 | 4.4 | 1.63 | 1.63 | 15.5 | 14.2 | 29   | 31.5 | 2.5 %                      |    |

**Table 2:** XPS results for monolayer made from single stranded DNA oligomers containing 15 bases (14 adenine and one guanine) deposited from  $\text{Mg}^{+2}$  buffer. The take-off angle is  $30^\circ$ .

| N/P<br>$\pm 10\%$ | C/P<br>$\pm 10\%$ | N/O<br>$\pm 10\%$ | % of $\text{Mg}^{+2}$<br>( $\text{Mg}/\text{P} \times 100\%$ )<br>$\pm 10\%$ |
|-------------------|-------------------|-------------------|------------------------------------------------------------------------------|
| 4.2               | 12.0              | 0.7               | 4.8                                                                          |

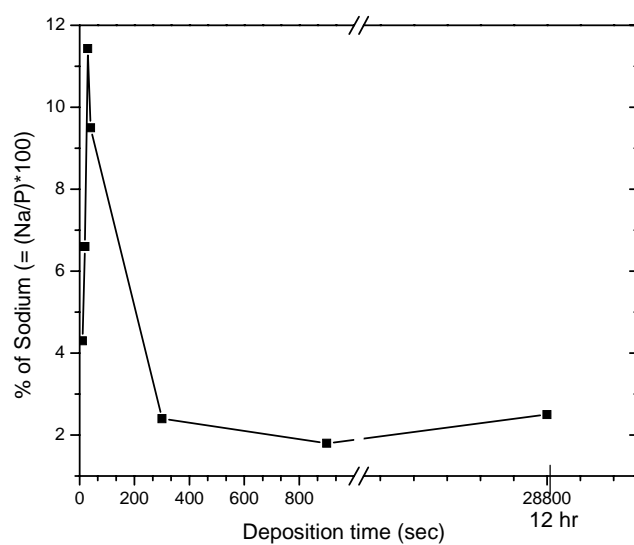

**Figure 2:** Concentration of  $\text{Na}^+$  as a function of adsorption time for a monolayer made from 15 bases long single strand DNA oligomer containing 14 adenine and 1 guanine base.

## Film characterization:

The monolayers made from the oligomers shown in Fig. 3 were investigated.

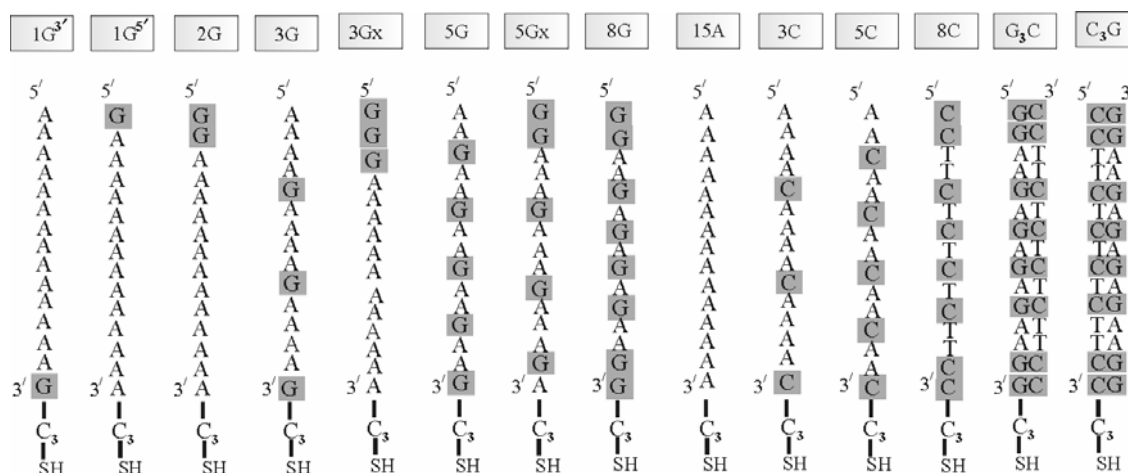

**Figure 3:** The oligomers that were used for making the self-assembled layer

The thickness of the monolayers made from the different oligomers is shown in Table 3.

**Table 3:** The thickness of different ds and ss monolayer, after 15 min. adsorption, calculated from spectroscopic ellipsometry for incidence angle  $\theta = 70^\circ$

| Sample                   | 1G <sup>3</sup> | 1G <sup>5</sup> | 3G | 5G | 8G | 8C | 15A | 5C | G <sub>3</sub> C |
|--------------------------|-----------------|-----------------|----|----|----|----|-----|----|------------------|
| Thickness ( Å )<br>± 2 Å | 33              | 31              | 30 | 33 | 32 | 30 | 30  | 32 | 37               |

While the thicknesses of the layers made from single stranded oligomers are all identical within the accuracy of the measurements, the layer made from the double strand (G<sub>3</sub>C) is clearly thicker. This finding is consistent with the double stranded DNA being more rigid, while the single strand oligomers are not completely stretched.

### *Density of the oligomers in the monolayer : Radioactive labeling (<sup>32</sup>P):*

The oligomers were radiolabeled with radioactive phosphate (<sup>32</sup>P) and then self assembled as monolayer. The density of adsorbed molecules was quantified with phosphoimager. The results are shown in Table 4. The coverage is about the same ( $\sim 1.4 \times 10^{13}$ ) for all the monolayers, within the error of the radioactive measurements.

**Table 4:** Coverage calculated from radioactive labeling for different ss and ds DNA monolayers

| Sample                                                | 1G  | 3G  | 5G  | 8G  | 8C  | 15A | G <sub>s</sub> C |
|-------------------------------------------------------|-----|-----|-----|-----|-----|-----|------------------|
| molecules/cm <sup>2</sup><br>× 10 <sup>13</sup> ± 0.4 | 1.5 | 1.8 | 1.2 | 1.7 | 1.9 | 0.9 | 1.1              |

Average number of molecules is  $1.4 \pm 0.4 \times 10^{13}$  molecules/cm<sup>2</sup>
